# Supplementary material for: Ultra-high aspect ratio hybrid materials: the role of organic guest and synthesis method
Source: Royal Society of Chemistry journal article supplement (doi:10.1039/c7dt04312k), 2018-01-01
Supplement: c7dt04312k1.pdf [file c7dt04312k1.pdf]

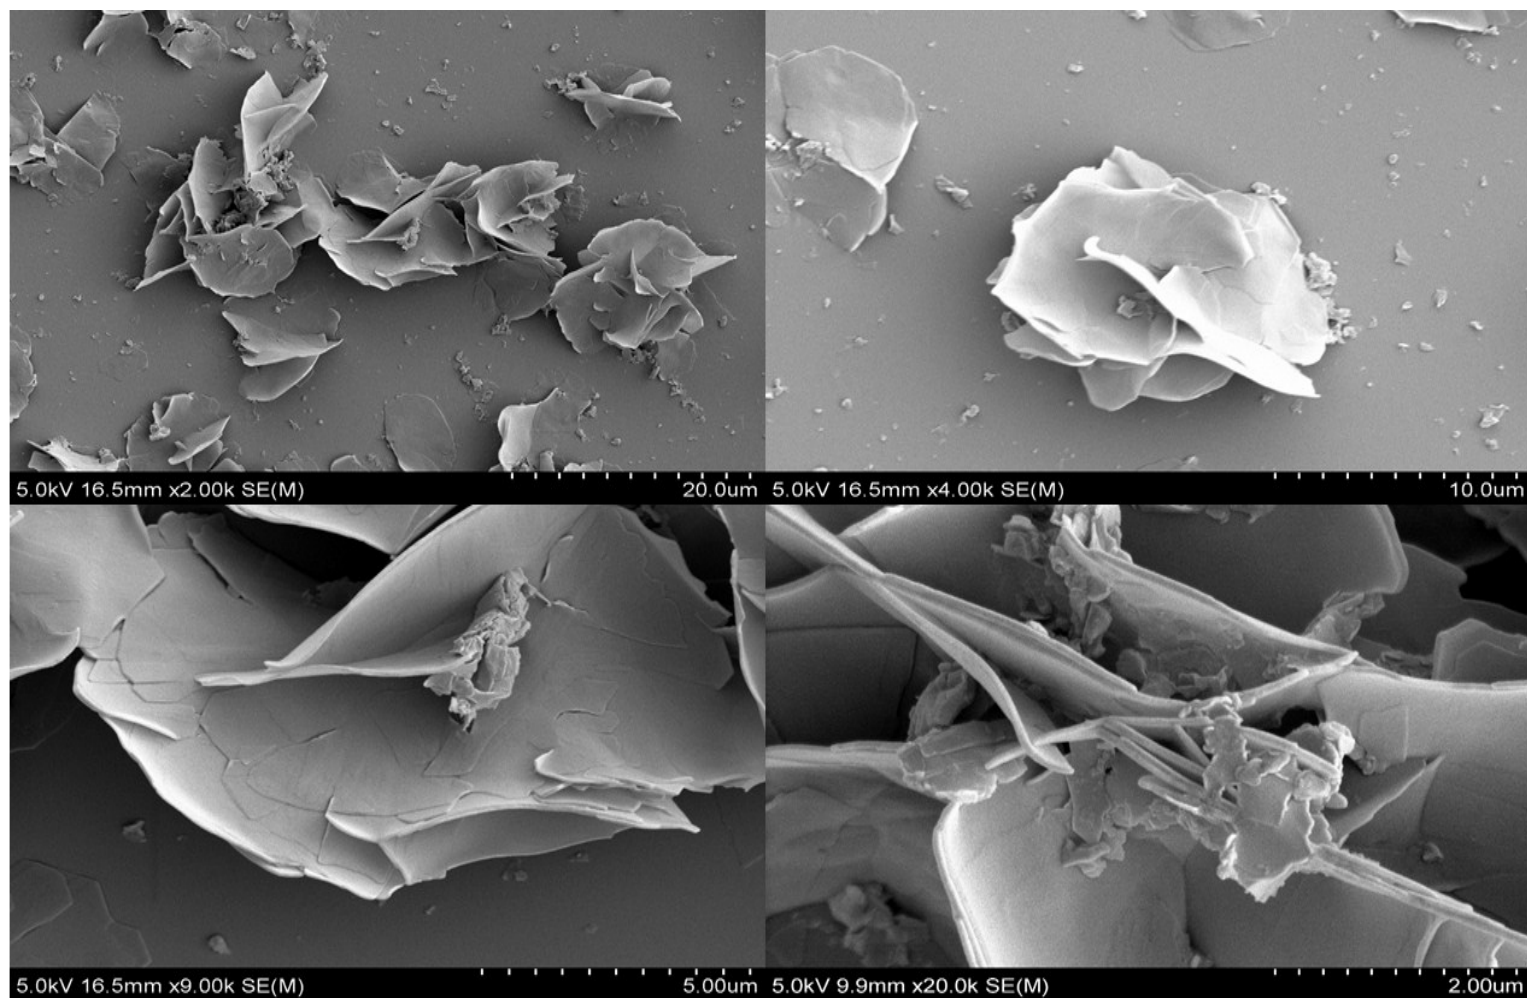

SI. 1 SEM images of Mg-Al-adamantanecarboxylate intercalated LDH (Mg/Al=2).

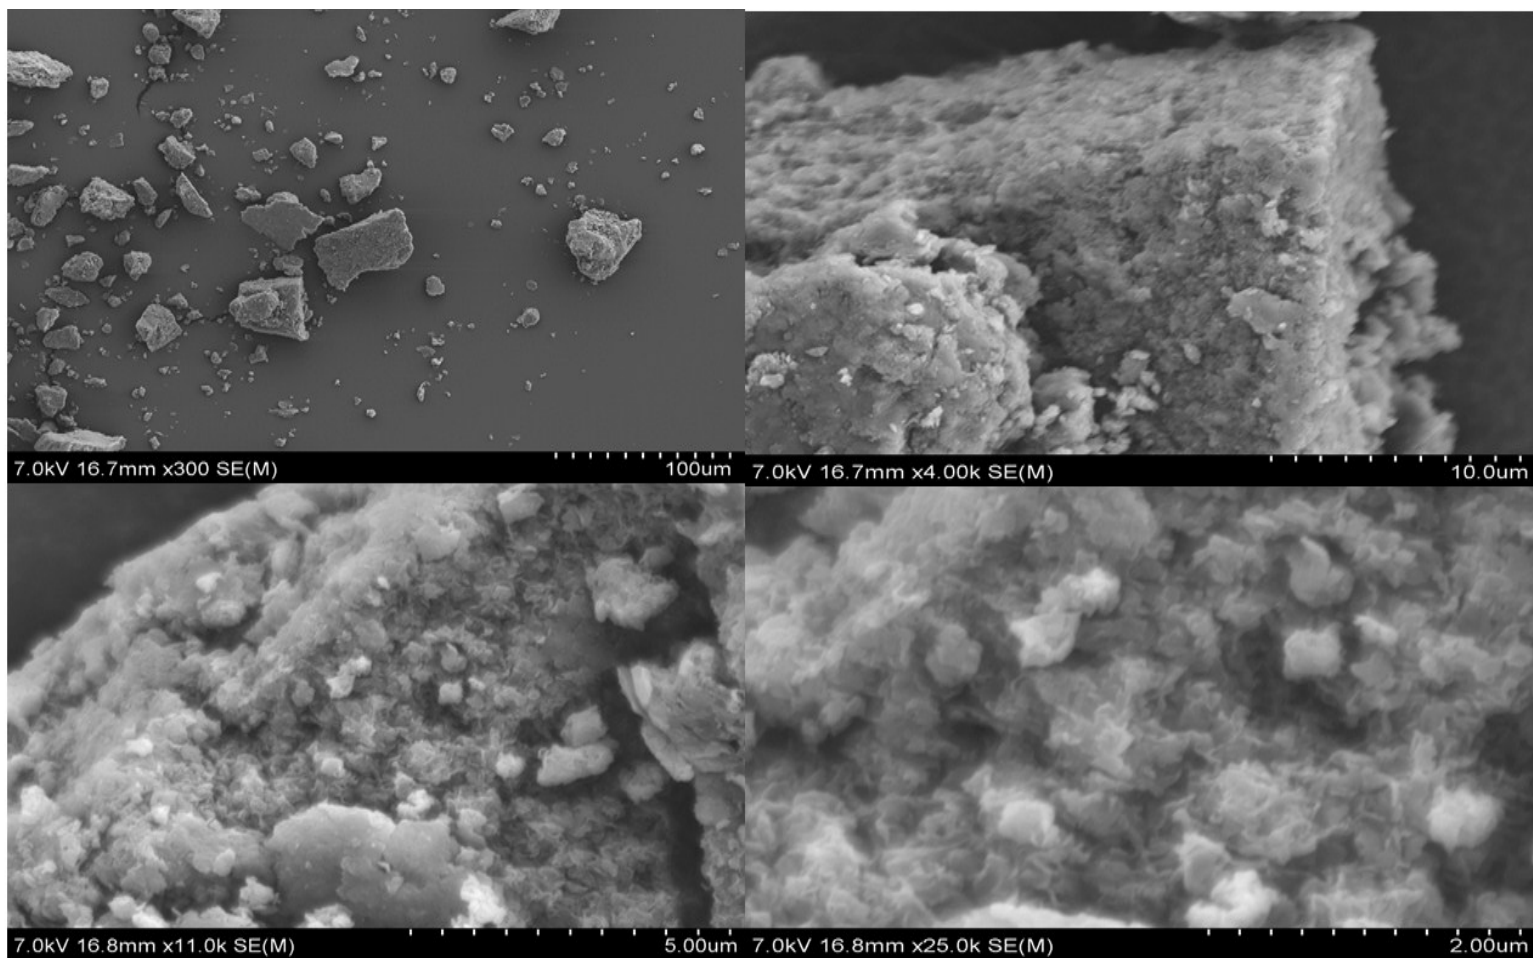

SI. 2 SEM images of Mg-Al-adamantanecarboxylate LDH (Mg/Al=2) prepared by co-precipitation method at pH 10.

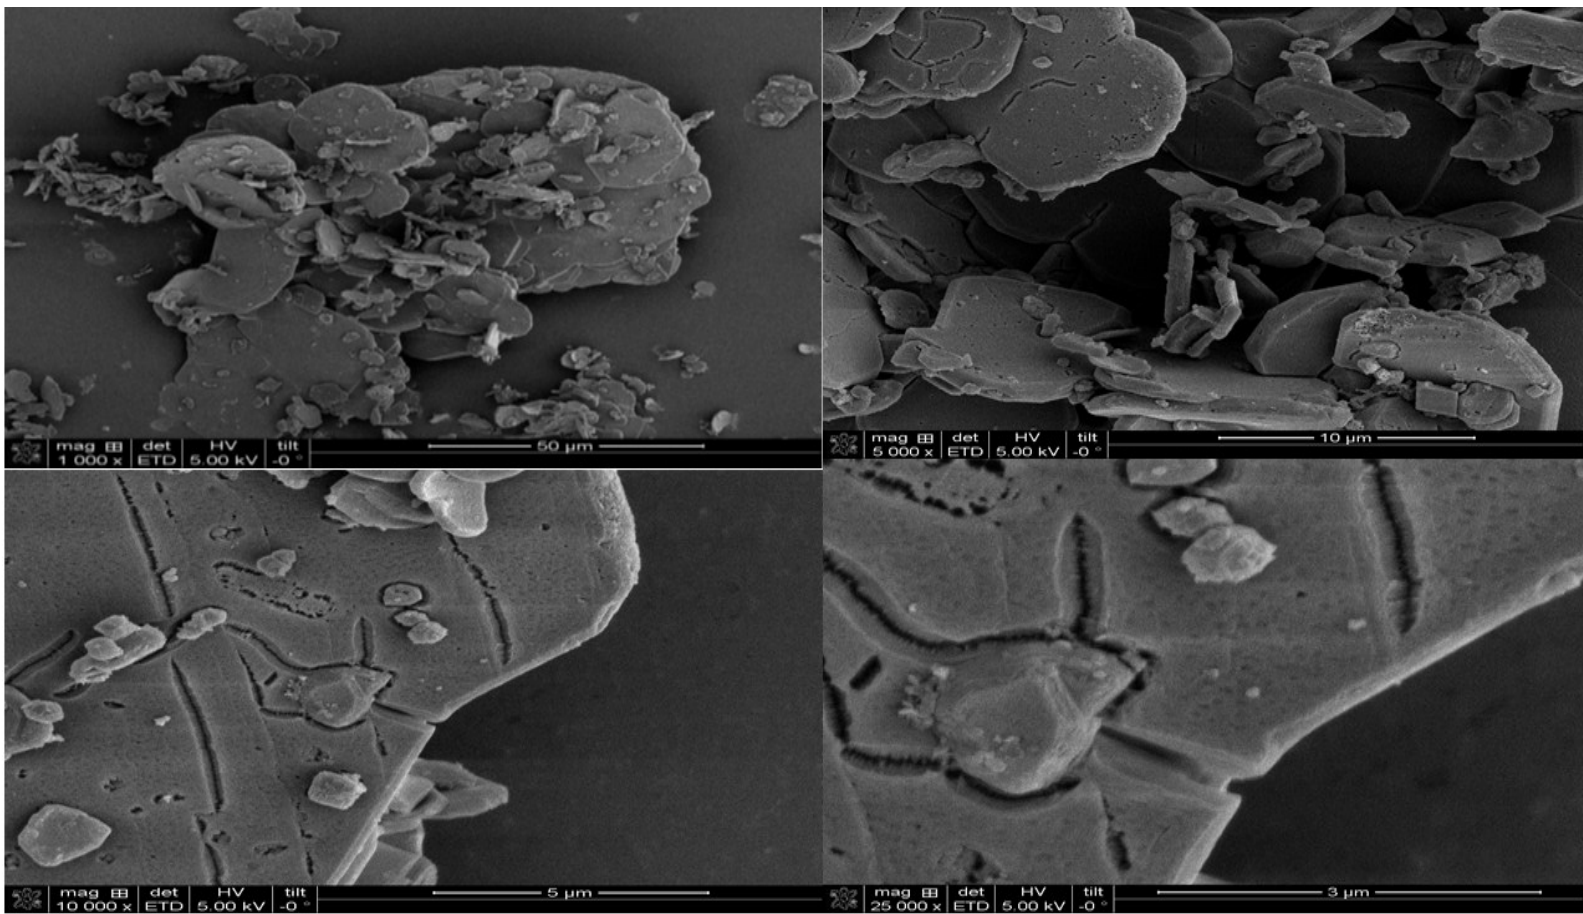

SI. 3 SEM images of Ca-Al-adamantanecarboxylate intercalated LDH (Ca/Al=2).
